# Supplementary material for: Minimally Invasive Lumbar Spinal Fusion Is More Effective Than Open Fusion: A Meta-Analysis
Source: PubMed Central journal article supplement — Yonsei Med J. 2018 May 3;59(4):524–38. doi: 10.3349/ymj.2018.59.4.524 (PMC5949295; doi:10.3349/ymj.2018.59.4.524), 2018-05-03
Supplement: ymj-59-524-s001.pdf [file ymj-59-524-s001.pdf]

**Supplementary Table 1. Search Strategies for PubMed, Embase, and Cochrane Library**

|                                              |                                                                                   |
|----------------------------------------------|-----------------------------------------------------------------------------------|
| Database: PubMed <up to October 8, 2017>     |                                                                                   |
| 1                                            | Spine/ or lumbar vertebrae/ (193808)                                              |
| 2                                            | Limit 1 to (English language and humans and ages 19+) (81049)                     |
| 3                                            | Spine fusion/ or arthrodesis/ (38808)                                             |
| 4                                            | Limit 3 to (English language and humans and ages 19+) (17392)                     |
| 5                                            | Minimally invasive / or mini-open/ or minimal access/ (1993)                      |
| 6                                            | Limit 5 to (English language and humans and ages 19+) (900)                       |
| 7                                            | 2 and 6 (576)                                                                     |
| 8                                            | 4 and 6 (236)                                                                     |
| 9                                            | 7 or 8 (745)                                                                      |
| Database: Embase <up to October 8, 2017>     |                                                                                   |
| 1                                            | Spine/ or lumbar spine/ or lumbar vertebra/or lumbosacral spine/ (194628)         |
| 2                                            | Limit 1 to (human and English language) (81303)                                   |
| 3                                            | Spine fusion/ or arthrodesis/ (31703)                                             |
| 4                                            | Limit 3 to (human and English language) (22209)                                   |
| 5                                            | Minimally invasive procedure/ or minimally invasive surgery/ (23495)              |
| 6                                            | Limit 5 to (human and English language) (16607)                                   |
| 7                                            | 2 and 6 (387)                                                                     |
| 8                                            | 4 and 6 (562)                                                                     |
| 9                                            | 7 or 8 (748)                                                                      |
| Database: Cochrane Library <October 8, 2017> |                                                                                   |
| 1                                            | MeSH descriptor Spine explode all trees (3093)                                    |
| 2                                            | MeSH descriptor Surgical Procedures, Minimally Invasive explode all trees (18382) |
| 3                                            | MeSH descriptor Spinal Fusion explode all trees (582)                             |
| 4                                            | (( #1 AND #2) OR (#2 AND #3)) (114)                                               |
