# Supplementary material for: Minimally Invasive Lumbar Spinal Fusion Is More Effective Than Open Fusion: A Meta-Analysis
Source: PubMed Central journal article supplement — Yonsei Med J. 2018 May 3;59(4):524–38. doi: 10.3349/ymj.2018.59.4.524 (PMC5949295; doi:10.3349/ymj.2018.59.4.524), 2018-05-03
Supplement: ymj-59-524-s002.pdf [file ymj-59-524-s002.pdf]

| Supplementary Table 2. Characteristics of all prospective comparative studies* |                |                                                                        |                                                                                                                                                                                                                                            |                                                                                                                                                                                                                                                                                                                                                                                                                                                                                                                                                                                                                                             |                                                                                                                                                                                                                                                                                                                     |
|--------------------------------------------------------------------------------|----------------|------------------------------------------------------------------------|--------------------------------------------------------------------------------------------------------------------------------------------------------------------------------------------------------------------------------------------|---------------------------------------------------------------------------------------------------------------------------------------------------------------------------------------------------------------------------------------------------------------------------------------------------------------------------------------------------------------------------------------------------------------------------------------------------------------------------------------------------------------------------------------------------------------------------------------------------------------------------------------------|---------------------------------------------------------------------------------------------------------------------------------------------------------------------------------------------------------------------------------------------------------------------------------------------------------------------|
| Studies                                                                        | Year published | Intervention<br>(Number of patients in percutaneous group, open group) | Diagnoses<br>(Number of patients in percutaneous group, open group)                                                                                                                                                                        | Inclusion criteria                                                                                                                                                                                                                                                                                                                                                                                                                                                                                                                                                                                                                          | Exclusion criteria                                                                                                                                                                                                                                                                                                  |
| Parker et al. <sup>19</sup>                                                    | 2014           | Single-level TLIF<br>(50, 50)                                          | Degenerative spondylolisthesis grade I (50, 50)                                                                                                                                                                                            | Evidence on MRI of grade I degenerative spondylolisthesis<br>Mechanical low back pain and radicular symptoms<br>Unresponsive to at least 6 weeks of conservative therapy<br>Between 18 and 70 years of age                                                                                                                                                                                                                                                                                                                                                                                                                                  | Previous back operation<br>An extraspinal cause of back pain or sciatica<br>An active medical or workman's compensation lawsuit<br>Any pre-existing spinal pathology<br>Unwilling or unable to participate with follow-up procedures                                                                                |
| Gu et al. <sup>21</sup>                                                        | 2013           | Two-level TLIF<br>(44, 38)                                             | Degenerative disc disease (15, 11)<br>Spinal stenosis (18, 14)<br>Spinal stenosis with segmental instability (11, 13)                                                                                                                      | Far-lateral disk herniation, huge lumbar disk herniation or recurrent lumbar disk herniation and symptomatic adjacent segment pathology/ degeneration; two-level lumbar stenosis both requiring facetectomy and fusion; symptomatic lumbar stenosis with degenerative disc disease combined with segmental instability; symptomatic degenerative disc disease<br>Two-level fusions were needed between L3 and S1<br>Persistent or recurrent low back pain or leg pain lasting at least six months and resulting in a significant reduction of quality of life, despite conservative therapy, including physical therapy and pain management | Previous spinal surgery, lumbar fracture, active infection, severe osteoporosis and severe obesity<br>Combination of coronal and/or sagittal deformities that needed a surgical correction<br>Degenerative spondylolisthesis with major instability or isthmic spondylolisthesis<br>Any major psychological problem |
| Lee et al. <sup>22</sup>                                                       | 2012           | Single-level TLIF<br>(72, 72)                                          | Spondylolisthesis (Grade 1 and 2)<br>Recurrent disc herniation<br>Spinal stenosis requiring resection of more than 50% of either facet joint<br>Degenerated collapsed disc requiring disc-space height restoration<br>(Specific number NR) | Single level TLIF<br>MIS cases utilizing Sextant I pedicle screw-rod instrumentation and Capstone interbody cage<br>Unresponsive to at least 6 months of conservative therapy                                                                                                                                                                                                                                                                                                                                                                                                                                                               | Previous spinal instrumentation<br>Tumor spinal pathologies<br>Spinal infection<br>Acute spinal trauma                                                                                                                                                                                                              |
| Mobbs et al. <sup>23</sup>                                                     | 2011           | Single- or Multi-level PLIF<br>(37, 30)                                | Isthmic spondylolisthesis (4, 9)<br>Degenerative spondylolisthesis (18, 9)<br>Degenerative scoliosis (1, 4)<br>Degenerative disc disease with foraminal stenosis (14, 8)                                                                   | Degenerative pathology only<br>Mechanical low back pain, radicular symptoms, claudication or combination<br>Unresponsive to at least 6 months of conservative therapy<br>Between 18 and 75 years of age                                                                                                                                                                                                                                                                                                                                                                                                                                     | NR                                                                                                                                                                                                                                                                                                                  |
| Kotani et al. <sup>24</sup>                                                    | 2011           | Single-level PLF<br>(43, 37)                                           | Degenerative spondylolisthesis (43, 37)                                                                                                                                                                                                    | Apparent intermittent neurological claudication and/or radicular neurological symptoms                                                                                                                                                                                                                                                                                                                                                                                                                                                                                                                                                      | Low back pain alone                                                                                                                                                                                                                                                                                                 |
| Wang et al. <sup>25</sup>                                                      | 2011           | Single- or two-level TLIF<br>(25, 27)                                  | Recurrent disc herniation (7, 8)<br>Postsurgical foraminal stenosis (10, 9)<br>Postsurgical segmental instability (5, 7)<br>Postsurgical spondylolisthesis grade I (3, 3)                                                                  | Failed discectomy and decompression by open posterior midline approach                                                                                                                                                                                                                                                                                                                                                                                                                                                                                                                                                                      | NR                                                                                                                                                                                                                                                                                                                  |
| Wang et al. <sup>26</sup>                                                      | 2010           | Single-level TLIF<br>(42, 43)                                          | Degenerative spondylolisthesis (24, 22)<br>Isthmic spondylolisthesis (18, 21)                                                                                                                                                              | Low back pain as their predominant complaint<br>Unresponsive to at least 3 months of conservative therapy                                                                                                                                                                                                                                                                                                                                                                                                                                                                                                                                   | NR                                                                                                                                                                                                                                                                                                                  |
| Schizas et al. <sup>27</sup>                                                   | 2008           | Single-level TLIF<br>(18, 18)                                          | Isthmic spondylolisthesis (15, 6)<br>Degenerative disc disease with foraminal stenosis (2, 12)<br>Iatrogenic spondylolysis (1, 0)                                                                                                          | NR                                                                                                                                                                                                                                                                                                                                                                                                                                                                                                                                                                                                                                          | NR                                                                                                                                                                                                                                                                                                                  |
| Park et al. <sup>29</sup>                                                      | 2007           | Single-level PLIF<br>(32, 29)                                          | Isthmic spondylolisthesis (6, 7)<br>Degenerative spondylolisthesis (7, 5)<br>Lumbar disc herniation (1, 3)<br>Spinal stenosis with segmental instability (18, 14)                                                                          | Segmental instability at the level of spinal stenosis<br>Huge lumbar disc herniation<br>Low-grade spondylolisthesis                                                                                                                                                                                                                                                                                                                                                                                                                                                                                                                         | Previous spinal surgery or those who needed multiple levels of decompression                                                                                                                                                                                                                                        |

\*TLIF = transforaminal lumbar interbody fusion, PLIF = posterior lumbar interbody fusion, PLF = posterolateral fusion, and NR = not reported.

| Supplementary Table 2. Continued* |                    |    |               |                 |                                                                           |                                                                                                                                                                |                                                                                                              |                                                |     |  |
|-----------------------------------|--------------------|----|---------------|-----------------|---------------------------------------------------------------------------|----------------------------------------------------------------------------------------------------------------------------------------------------------------|--------------------------------------------------------------------------------------------------------------|------------------------------------------------|-----|--|
| Studies                           | Comparison group   | N  | Age           | Gender Male (%) | Fusion level                                                              | Instrumentations including cage and pedicle screw                                                                                                              | Bone graft                                                                                                   | Follow-up† (months)                            | CMS |  |
| Parker et al. <sup>19</sup>       | Percutaneous group | 50 | 53.5 ± 12.5   | 16 (32)         | L3-4; 4<br>L4-5; 32<br>L5-S1; 14                                          | A single PEEK interbody cage and percutaneous pedicle screw system (implants NR)                                                                               | Local autogenous bone with or without bone extensors (i.e., DBM)                                             | 24,<br>% followed: NR                          | 74  |  |
|                                   | Open group         | 50 | 52.6 ± 11.6   | 18 (36)         | L3-4; 3<br>L4-5; 30<br>L5-S1; 17                                          | A single PEEK interbody cage and conventional pedicle screw system (implants NR)                                                                               | Local autogenous bone with or without bone extensors (i.e., DBM)                                             | 24,<br>% followed: NR                          |     |  |
| Gu et al. <sup>21</sup>           | Percutaneous group | 44 | 66.4 ± 6.7    | 19 (43.2)       | L3-5; 13<br>L4-S1; 31                                                     | A single PEEK interbody cage (Capstone; Medtronic, USA) and percutaneous pedicle screw system (Sextant; Medtronic, USA)                                        | Local autologous bone                                                                                        | 20.6 ± 4.5,<br>% followed: NR                  | 74  |  |
|                                   | Open group         | 38 | 64.1 ± 7.8    | 15 (39.5)       | L3-5; 14<br>L4-S1; 24                                                     | NR                                                                                                                                                             | NR                                                                                                           | 20.0 ± 3.3,<br>% followed: NR                  |     |  |
| Lee et al. <sup>22</sup>          | Percutaneous group | 72 | 52.2 ± 13.8   | 20 (27.8)       | L3-4; 6<br>L4-5; 49<br>L5-S1; 17                                          | A single PEEK interbody cage (Capstone; Medtronic, USA) and percutaneous pedicle screw system (Sextant; Medtronic, USA)                                        | Local autogenous bone with DBM (Osteofil; Medtronic, USA)                                                    | 24,<br>95.8% (69/72)<br>followed for 24 months | 77  |  |
|                                   | Open group         | 72 | 56.6 ± 14.6   | 22 (30.6)       | L3-4; 4<br>L4-5; 54<br>L5-S1; 14                                          | A single PEEK interbody cage (Capstone; Medtronic, Memphis, TN, USA) and conventional pedicle screw system (implants NR)                                       | Local autogenous bone with DBM (Osteofil; Medtronic, USA) and one case with rhBMP-2 (Infuse; Medtronic, USA) | 24,<br>91.7% (66/72)<br>followed for 24 months |     |  |
| Mobbs et al. <sup>23</sup>        | Percutaneous group | 37 | 68.56 ± 12.99 | 19 (51.4)       | T11-12; 0<br>L2-3; 1<br>L3-4; 2<br>L4-5; 20<br>L5-S1; 6<br>Multi-level; 8 | A single rotatable interbody cage (implants NR) and percutaneous pedicle screw systems (Denali/Serengeti system; K2M, USA and MANTIS; Stryker, USA)            | Local autogenous bone with or without synthetic bone                                                         | 11.5 (5.4-20.1),<br>% followed: NR             | 72  |  |
|                                   | Open group         | 30 | 67.48 ± 13.19 | 16 (53.3)       | T11-12; 1<br>L2-3; 0<br>L3-4; 0<br>L4-5; 15<br>L5-S1; 9<br>Multi-level; 5 | A single rotatable interbody cage and conventional pedicle screw system (implants NR)                                                                          | Local autogenous bone with or without synthetic bone                                                         | 18.7 (8.1-40.0),<br>% followed: NR             |     |  |
| Kotani et al. <sup>24</sup>       | Percutaneous group | 43 | 63 ± 9        | 14 (32.6)       | L3-4; 4<br>L4-5; 76<br>(No specific declaration between groups)           | Percutaneous pedicle screw system (Sextant; Medtronic, USA)                                                                                                    | Autogenous posterior iliac crest bone                                                                        | 32 (24-49),<br>% followed: NR                  | 80  |  |
|                                   | Open group         | 37 | 66 ± 9        | 12 (32.4)       |                                                                           | Conventional polyaxial pedicle screw and rod system (implants NR)                                                                                              | Autogenous posterior iliac crest bone                                                                        | 40 (24-60),<br>% followed: NR                  |     |  |
| Wang et al. <sup>25</sup>         | Percutaneous group | 25 | 54.8 ± 10.9   | 13 (52.0)       | L3-4; 2<br>L4-5; 11<br>L5-S1; 9<br>Two-level; 3                           | A single PEEK interbody cage (OIC; Stryker, USA) and percutaneous pedicle screw system (Sextant; Medtronic, USA)                                               | Local autogenous bone with or without autogenous iliac crest bone                                            | Overall, 27.5 (12-38), % followed: NR          | 68  |  |
|                                   | Open group         | 27 | 56.2 ± 13.6   | 15 (55.6)       | L3-4; 2<br>L4-5; 11<br>L5-S1; 10<br>Two-level; 4                          | A single PEEK interbody cage (OIC; Stryker, USA) and conventional pedicle screw system (implants NR)                                                           | NR                                                                                                           |                                                |     |  |
| Wang et al. <sup>26</sup>         | Percutaneous group | 42 | 47.9 ± 8.5    | 13 (30.1)       | L3-4; 3<br>L4-5; 21<br>L5-S1; 18                                          | A single PEEK interbody cage (OIC, Stryker, USA) and percutaneous pedicle screw system (Sextant; Medtronic, USA)                                               | Local autogenous bone                                                                                        | Overall, 26.3 (13-35), % followed: NR          | 70  |  |
|                                   | Open group         | 43 | 53.2 ± 10.6   | 16 (37.2)       | L3-4; 3<br>L4-5; 23<br>L5-S1; 17                                          | NR                                                                                                                                                             | NR                                                                                                           |                                                |     |  |
| Schizas et al. <sup>27</sup>      | Percutaneous group | 18 | 45.5 ± NR     | NR              | L5-S1; 12<br>Other level NR; 6                                            | A single PEEK interbody cage (Medtronic, USA) and percutaneous pedicle screw system (Sextant (11 cases); Medtronic, USA and Viper (7 cases); DePuy Spine, USA) | Local autologous bone with autogenous iliac crest bone                                                       | 22,<br>% followed: NR                          | 61  |  |
|                                   | Open group         | 18 | 48.1 ± NR     | NR              | L5-S1; 11<br>Other level NR; 7                                            | NR                                                                                                                                                             | Local autologous bone with autogenous iliac crest bone                                                       | 24,<br>% followed: NR                          |     |  |
| Park et al. <sup>29</sup>         | Percutaneous group | 32 | 62.1 ± 9.6    | 8 (25)          | L3-4; 2<br>L4-5; 23<br>L5-S1; 7                                           | A single PEEK interbody cage (Telamon; Medtronic, USA) and percutaneous pedicle screw system (Sextant; Medtronic, USA)                                         | Local autogenous bone                                                                                        | 12,<br>% followed: NR                          | 56  |  |
|                                   | Open group         | 29 | 59 ± 12.2     | 13 (44.8)       | L3-4; 3<br>L4-5; 18<br>L5-S1; 8                                           | A single PEEK interbody cage (Telamon; Medtronic, USA) and conventional pedicle screw system (implants NR)                                                     | Local autogenous bone                                                                                        | 12,<br>% followed: NR                          |     |  |

\*CMS = Coleman Methodology Score, PEEK = polyetheretherketone, NR = not reported, DBM = demineralized bone matrix, and rhBMP-2 = recombinant human bone morphogenetic protein-2.
