# Supplementary material for: Minimally Invasive Lumbar Spinal Fusion Is More Effective Than Open Fusion: A Meta-Analysis
Source: PubMed Central journal article supplement — Yonsei Med J. 2018 May 3;59(4):524–38. doi: 10.3349/ymj.2018.59.4.524 (PMC5949295; doi:10.3349/ymj.2018.59.4.524), 2018-05-03
Supplement: ymj-59-524-s003.pdf [file ymj-59-524-s003.pdf]

| Supplementary Table 3. Clinical outcome scores in the prospective comparative studies* |                                 |                    |                |               |                |                                  |
|----------------------------------------------------------------------------------------|---------------------------------|--------------------|----------------|---------------|----------------|----------------------------------|
| Studies                                                                                | Clinical outcome scores         | Percutaneous group |                | Open group    |                | Follow-up† (months)              |
|                                                                                        |                                 | Preoperative       | Last follow-up | Preoperative  | Last follow-up |                                  |
| Parker et al. <sup>19</sup>                                                            | VAS back pain                   | 8.1 ± 2.6          | 3.3 ± 2.9      | 8.5 ± 2.2     | 3.6 ± 2.8      | 24‡, 24                          |
|                                                                                        | VAS leg pain                    | 6.5 ± 3.6          | 3.0 ± 3.0      | 6.9 ± 3.3     | 2.7 ± 2.6      |                                  |
|                                                                                        | ODI                             | 32.3 ± 6.7         | 11.0 ± 9.4     | 34.3 ± 7.9    | 15.6 ± 10.3    |                                  |
|                                                                                        | SF-12 PCS                       | 29.8 ± 8.2         | 44.3 ± 11.2    | 26.3 ± 7.5    | 41.3 ± 11.8    |                                  |
|                                                                                        | SF-12 MCS                       | 45.9 ± 13.9        | 54.5 ± 10.8    | 42.1 ± 15.3   | 52.0 ± 10.1    |                                  |
|                                                                                        | EQ-5D                           | 0.38 ± 0.23        | 0.85 ± 0.20    | 0.32 ± 0.27   | 0.76 ± 0.23    |                                  |
|                                                                                        | Zung depression index           | 40.6 ± 12.4        | 28.6 ± 10.6    | 40.9 ± 10.3   | 29.7 ± 9.7     |                                  |
|                                                                                        |                                 |                    |                |               |                |                                  |
| Gu et al. <sup>21</sup>                                                                | VAS back pain                   | 7.3 ± NR           | 1.9 ± NR       | 7.4 ± NR      | 1.8 ± NR       | 20.6 ± 4.5, 20.0 ± 3.3           |
|                                                                                        | VAS leg pain                    | 7.6 ± NR           | 1.7 ± NR       | 7.7 ± NR      | 1.8 ± NR       |                                  |
|                                                                                        | ODI                             | 43.7 ± NR          | 16.5 ± NR      | 44.3 ± NR     | 15.9 ± NR      |                                  |
| Lee et al. <sup>22</sup>                                                               | VAS back pain                   | 6.3 ± 2.9          | 2.3 ± 3.0      | 6.3 ± 2.9     | 2.4 ± 2.7      | 24, 24                           |
|                                                                                        | VAS leg pain                    | 5.8 ± 3.3          | 1.6 ± 2.7      | 6.2 ± 3.1     | 2.0 ± 2.8      |                                  |
|                                                                                        | SF-36 physical function         | 43.1 ± 26.8        | 68.1 ± 26.8    | 42.8 ± 27.0   | 65.4 ± 25.4    |                                  |
|                                                                                        | ODI                             | 48.1 ± 18.8        | 21.4 ± 20.9    | 44.4 ± 18.0   | 20.7 ± 16.5    |                                  |
|                                                                                        | NASS                            | 50.6 ± 28.3        | 18.5 ± 26.3    | 45.5 ± 26.2   | 18.7 ± 23.0    |                                  |
|                                                                                        |                                 |                    |                |               |                |                                  |
| Mobbs et al. <sup>23</sup>                                                             | VAS back pain                   | 7.917 ± 1.505      | 2.417 ± 2.156  | 8.259 ± 1.573 | 3.328 ± 1.502  | 11.5 (5.4-20.1), 18.7 (8.1-40.0) |
|                                                                                        | ODI                             | 54.56 ± 19.47      | 22.97 ± 16.50  | 52.38 ± 17.25 | 28.09 ± 16.71  |                                  |
|                                                                                        | SF-12 PCS                       | NR                 | 41.20 ± 11.45  | NR            | 36.86 ± 10.64  |                                  |
|                                                                                        | SF 12 MCS                       | NR                 | 50.06 ± 8.841  | NR            | 50.86 ± 10.95  |                                  |
| Kotani et al. <sup>24</sup>                                                            | VAS back pain                   | 73.0 ± NR          | NR             | 73.7 ± NR     | NR             | 32 (24-49), 40 (24-60)           |
|                                                                                        | JOA                             | 11.1 ± NR          | 23.5 ± NR      | 12.6 ± NR     | 22.8 ± NR      |                                  |
|                                                                                        | ODI                             | 52.0 ± NR          | 13.2 ± NR      | 48.9 ± NR     | 32.1 ± NR      |                                  |
|                                                                                        | RMQ                             | 12.2 ± NR          | 5.1 ± NR       | 13.7 ± NR     | 10.9 ± NR      |                                  |
| Wang et al. <sup>25</sup>                                                              | VAS back pain                   | 7.1 ± 2.4          | 1.3 ± 0.5      | 6.9 ± 1.7     | 1.5 ± 0.4      | Overall, 27.5 (12-38)            |
|                                                                                        | VAS leg pain                    | NR                 | 1.0 ± 0.3      | NR            | 1.3 ± 0.4      |                                  |
|                                                                                        | ODI                             | 39.7 ± 10.1        | 12.4 ± 3.6     | 37.9 ± 8.2    | 11.5 ± 4.2     |                                  |
| Wang et al. <sup>26</sup>                                                              | VAS back pain                   | 7.2 ± 2.1          | 0.92 ± 0.5     | 7.4 ± 1.6     | 1.1 ± 0.6      | Overall, 26.3 (13-35)            |
|                                                                                        | ODI                             | 41.2 ± 6.6         | 10.8 ± 3.3     | 38.5 ± 7.4    | 12.2 ± 3.9     |                                  |
| Schizas et al. <sup>27</sup>                                                           | VAS                             | 7.7 ± NR           | 3.5 ± NR       | 5.0 ± NR      | 2.8 ± NR       | 22, 24                           |
|                                                                                        | ODI                             | 55 ± NR            | 33 ± NR        | 53 ± NR       | 27 ± NR        |                                  |
| Park et al. <sup>29</sup>                                                              | VAS back pain                   | NR                 | 2.1 ± 1.4      | NR            | 3.8 ± 1.8      | 12, 12                           |
|                                                                                        | Prolo score (good to excellent) |                    | 29/32(90.7%)   |               | 26/29(89.6%)   |                                  |

\* VAS = visual analogue scale, ODI = Oswestry Disability Index, SF = short form, PCS = physical component score, MCS = mental component score, EQ-5D = euro quality of life, JOA = Japanese Orthopaedic Association, RMQ = Roland-Morris Questionnaire, NASS = North American Spine Society score, and NR = not reported. †The values are given as the mean, with the range in parenthesis. ‡ The values appear in order of percutaneous group and open group.
