# Supplementary material for: Minimally Invasive Lumbar Spinal Fusion Is More Effective Than Open Fusion: A Meta-Analysis
Source: PubMed Central journal article supplement — Yonsei Med J. 2018 May 3;59(4):524–38. doi: 10.3349/ymj.2018.59.4.524 (PMC5949295; doi:10.3349/ymj.2018.59.4.524), 2018-05-03
Supplement: ymj-59-524-s004.pdf [file ymj-59-524-s004.pdf]

| Supplementary Table 4. Clinical outcome scores in the prospective comparative studies* |                                 |                    |                          |            |            |                          |            |                    |
|----------------------------------------------------------------------------------------|---------------------------------|--------------------|--------------------------|------------|------------|--------------------------|------------|--------------------|
| Outcomes                                                                               | Studies                         | Percutaneous group |                          |            | Open group |                          |            | WMD (95% CI) ‡     |
|                                                                                        |                                 | Scores†            | Total number of patients | Follow-up† | Scores†    | Total number of patients | Follow-up† |                    |
| <i>Pain and function</i>                                                               |                                 |                    |                          |            |            |                          |            |                    |
| VAS back pain, preoperative                                                            | 5 <sup>19, 22, 23, 25, 26</sup> | 7.3±0.7            | 258                      | 20.9±7.2   | 7.5±0.9    | 251                      | 20.9±7.2   | 0.2 (-0.2 to 0.6)  |
| VAS back pain, last follow-up                                                          |                                 | 2.1±0.9            |                          |            | 2.4±1.1    |                          |            |                    |
| VAS leg pain, preoperative                                                             | 2 <sup>19, 22</sup>             | 6.2±0.5            | 147                      | 25.2±2.0   | 6.6±0.5    | 149                      | 25.2±2.0   | 0.3 (-0.5 to 1.0)  |
| VAS leg pain, last follow-up                                                           |                                 | 2.3±1.0            |                          |            | 2.4±0.5    |                          |            |                    |
| ODI, preoperative                                                                      | 5 <sup>19, 22, 23, 25, 26</sup> | 43.2±8.5           | 226                      | 24.2±4.8   | 41.5±7.1   | 222                      | 24.2±4.8   | 3.2 (1.5 to 5.0)§  |
| ODI, last follow-up                                                                    |                                 | 15.7±6.0           |                          |            | 17.6±6.9   |                          |            |                    |
| <i>Health-related quality of life</i>                                                  |                                 |                    |                          |            |            |                          |            |                    |
| SF-12 PCS, preoperative                                                                | 1 <sup>19</sup>                 | 29.8               | 50                       | 24         | 26.3       | 50                       | 24         | 0.5 (-3.5 to 4.5)  |
| SF-12 PCS, last follow-up                                                              | 2 <sup>19, 23</sup>             | 42.8               | 87                       |            | 39.1       | 80                       |            |                    |
| SF-12 MCS, preoperative                                                                | 1 <sup>19</sup>                 | 45.9               | 50                       | 24         | 42.1       | 50                       | 24         | 1.3 (-3.8 to 6.4)  |
| SF-12 MCS, last follow-up                                                              | 2 <sup>19, 23</sup>             | 52.3               | 87                       |            | 51.4       | 80                       |            |                    |
| SF-36 physical function, preoperative                                                  | 1 <sup>22</sup>                 | 43.1               | 72                       | 24         | 42.8       | 72                       | 24         | 2.4 (-6.3 to 11.1) |
| SF-36 physical function, last follow-up                                                |                                 | 68.1               |                          |            | 65.4       |                          |            |                    |
| <i>Others</i>                                                                          |                                 |                    |                          |            |            |                          |            |                    |
| EQ-5D, preoperative                                                                    | 1 <sup>19</sup>                 | 0.4                | 50                       | 24         | 0.3        | 50                       | 24         | 0.3 (-0.1 to 0.1)  |
| EQ-5D, last follow-up                                                                  |                                 | 0.9                |                          |            | 0.8        |                          |            |                    |
| NASS, preoperative                                                                     | 1 <sup>22</sup>                 | 50.6               | 72                       | 24         | 45.5       | 72                       | 24         | 5.3 (-3.2 to 13.8) |
| NASS, last follow-up                                                                   |                                 | 18.5               |                          |            | 18.7       |                          |            |                    |
| Zung depression index, preoperative                                                    | 1 <sup>19</sup>                 | 40.6               | 50                       | 24         | 40.9       | 50                       | 24         | 0.8 (-3.4 to 5.0)  |
| Zung depression index, last follow-up                                                  |                                 | 28.6               |                          |            | 29.7       |                          |            |                    |

\* WMD = weighted mean difference, CI = confidence interval, VAS = visual analogue scale, ODI = Oswestry Disability Index, SF = short form, PCS = physical component score, MCS = mental component score, EQ-5D = euro quality of life, JOA = Japanese Orthopaedic Association, RMQ = Roland-Morris Questionnaire, NASS = North American Spine Society score, and NR = not reported. † The values are given as the mean ± standard deviation. ‡ WMD = weighted mean difference, CI = confidence interval. §p < 0.0001.
