# Supplementary material for: Minimally Invasive Lumbar Spinal Fusion Is More Effective Than Open Fusion: A Meta-Analysis
Source: PubMed Central journal article supplement — Yonsei Med J. 2018 May 3;59(4):524–38. doi: 10.3349/ymj.2018.59.4.524 (PMC5949295; doi:10.3349/ymj.2018.59.4.524), 2018-05-03
Supplement: ymj-59-524-s005.pdf [file ymj-59-524-s005.pdf]

| Supplementary Table 5. Fusion rate in the prospective comparative studies* |                   |                                                                                                                                                                                                                 |                    |                          |                |                          |                                  |
|----------------------------------------------------------------------------|-------------------|-----------------------------------------------------------------------------------------------------------------------------------------------------------------------------------------------------------------|--------------------|--------------------------|----------------|--------------------------|----------------------------------|
| Studies                                                                    | Fusion modalities | Fusion assessment methods                                                                                                                                                                                       | Percutaneous group |                          | Open group     |                          | Follow-up† (months)              |
|                                                                            |                   |                                                                                                                                                                                                                 | Fusion success     | Total number of patients | Fusion success | Total number of patients |                                  |
| Parker et al. <sup>19</sup>                                                | TLIF              | Pseudarthrosis defined as new back pain or recurrence of back pain, evidence of screw haloing on computed tomography or motion of flexion/extension films                                                       | 50                 | 50                       | 50             | 50                       | 24‡, 24                          |
| Gu et al. <sup>21</sup>                                                    | TLIF              | Bridwell posterior fusion grade I or II<br>Grade I: solid trabeculated transverse process and facet fusions bilaterally<br>Grade II: thick fusion mass on one side and difficult to visualize on the other side | 41                 | 44                       | 35             | 38                       | 20.6 ± 4.5, 20.0 ± 3.3           |
| Lee et al. <sup>22</sup>                                                   | TLIF              | Bridewell anterior fusion grade I or II<br>Grade I: Fused with remodeling and trabeculae present<br>Grade II: Graft intact, not fully remodeled and incorporated, but no lucency present                        | 70                 | 72                       | 71             | 72                       | 24, 24                           |
| Mobbs et al. <sup>23</sup>                                                 | PLIF              | Pseudarthrosis defined as complaints of worsening mechanical lower back pain at operation site, significant motion and subsidence on flexion-extension lateral radiographs and CT scans                         | 37                 | 37                       | 28             | 30                       | 11.5 (5.4-20.1), 18.7 (8.1-40.0) |
| Kotani et al. <sup>24</sup>                                                | PLF               | Bony continuity between consecutive facet joints and transverse processes on plain radiographs and parasagittal CT scans                                                                                        | 42                 | 43                       | 37             | 37                       | 32 (24-49), 40 (24-60)           |
| Wang et al. <sup>25</sup>                                                  | TLIF              | Trabecular bony bridge formation between contiguous vertebral bodies at the instrumented levels, intact hardware, and less than 3° segmental movement on static and dynamic plain radiographs                   | 24                 | 25                       | 26             | 27                       | Overall, 27.5 (12-38)            |
| Wang et al. <sup>26</sup>                                                  | TLIF              | Trabecular bony bridge formation between contiguous vertebral bodies at the instrumented levels, less than 4° segmental movement on static and dynamic plain radiographs                                        | 41                 | 42                       | 42             | 43                       | Overall, 26.3 (13-35)            |
| Schizas et al. <sup>27</sup>                                               | TLIF              | Pseudarthrosis defined as increasing back pain, evidence of screw loosening or breakage on plain radiographs and confirmed using CT scans                                                                       | 15                 | 18                       | 18             | 18                       | 22, 24                           |
| Park et al. <sup>29</sup>                                                  | PLIF              | Bridging interbody bone, no motion on lateral flexion-extension radiographs, and absence of continuous interbody radiolucent lines                                                                              | 31                 | 32                       | 28             | 29                       | 12, 12                           |

\* TLIF = transforaminal lumbar interbody fusion, PLIF = posterior lumbar interbody fusion, PLF = posterolateral fusion, and CT = computed tomography. † The values are given as the mean, with the range in parenthesis. ‡ The values appear in order of percutaneous group and open group.
