# Supplementary material for: Minimally Invasive Lumbar Spinal Fusion Is More Effective Than Open Fusion: A Meta-Analysis
Source: PubMed Central journal article supplement — Yonsei Med J. 2018 May 3;59(4):524–38. doi: 10.3349/ymj.2018.59.4.524 (PMC5949295; doi:10.3349/ymj.2018.59.4.524), 2018-05-03
Supplement: ymj-59-524-s006.pdf [file ymj-59-524-s006.pdf]

| Supplementary Table 6. Subgroup analysis of fusion rate*                                                                                                                                                                                                                                                                                    |                                  |                    |                          |                    |                          |                     |                    |
|---------------------------------------------------------------------------------------------------------------------------------------------------------------------------------------------------------------------------------------------------------------------------------------------------------------------------------------------|----------------------------------|--------------------|--------------------------|--------------------|--------------------------|---------------------|--------------------|
| Fusion modalities                                                                                                                                                                                                                                                                                                                           | Studies                          | Percutaneous group |                          | Open group         |                          | Follow-up†          | OR (95% CI)        |
|                                                                                                                                                                                                                                                                                                                                             |                                  | Fusion success (%) | Total number of patients | Fusion success (%) | Total number of patients |                     |                    |
| <b>Overall fusion success</b>                                                                                                                                                                                                                                                                                                               |                                  |                    |                          |                    |                          |                     |                    |
| TLIF                                                                                                                                                                                                                                                                                                                                        | 6 <sup>19, 21, 22, 25 - 27</sup> | 241 (96.0)         | 251                      | 242 (97.6)         | 248                      | 24.1±2.6, 24.3±2.6‡ | 0.7 (0.2 to 2.0)   |
| PLIF                                                                                                                                                                                                                                                                                                                                        | 2 <sup>23, 29</sup>              | 68 (98.6)          | 69                       | 56 (94.9)          | 59                       | 11.8±0.4, 15.4±4.7  | 2.5 (0.3 to 19.9)  |
| PLF                                                                                                                                                                                                                                                                                                                                         | 1 <sup>24</sup>                  | 42 (97.7)          | 43                       | 37 (100)           | 37                       | 32±0, 40±0          | 0.4 (0.01 to 9.6)  |
| Overall                                                                                                                                                                                                                                                                                                                                     | 9 <sup>19, 21 - 27, 29</sup>     | 351 (96.7)         | 363                      | 335 (97.4)         | 344                      | 22.2±6.8, 24.1±7.6  | 0.9 (0.3 to 2.1)   |
| <b>Fusion success of patients with spondylolisthesis</b>                                                                                                                                                                                                                                                                                    |                                  |                    |                          |                    |                          |                     |                    |
| TLIF                                                                                                                                                                                                                                                                                                                                        | 2 <sup>19, 26</sup>              | 91 (98.9)          | 92                       | 92 (98.9)          | 93                       | 25.2±1.6, 25.2±1.6  | 1.0 (0.06 to 16.1) |
| PLF                                                                                                                                                                                                                                                                                                                                         | 1 <sup>24</sup>                  | 42 (97.7)          | 43                       | 37 (100)           | 37                       | 32±0, 40±0          | 0.4 (0.01 to 9.6)  |
| Overall                                                                                                                                                                                                                                                                                                                                     | 3 <sup>19, 24, 26</sup>          | 133 (98.5)         | 135                      | 129 (99.2)         | 130                      | 27.4±4.1, 30.1±8.7  | 0.6 (0.08 to 5.4)  |
| <b>Fusion success of patients with mixed diagnoses</b>                                                                                                                                                                                                                                                                                      |                                  |                    |                          |                    |                          |                     |                    |
| TLIF                                                                                                                                                                                                                                                                                                                                        | 4 <sup>21, 22, 25, 27</sup>      | 150 (94.3)         | 159                      | 150 (96.8)         | 155                      | 23.5±3.0, 23.9±3.1  | 0.7 (0.2 to 2.1)   |
| PLIF                                                                                                                                                                                                                                                                                                                                        | 2 <sup>23, 29</sup>              | 68 (98.6)          | 69                       | 56 (94.9)          | 59                       | 11.8±0.4, 15.4±4.7  | 2.5 (0.3 to 19.9)  |
| Overall                                                                                                                                                                                                                                                                                                                                     | 6 <sup>21 - 23, 25, 27, 29</sup> | 218 (95.6)         | 228                      | 206 (96.3)         | 214                      | 19.6±6.5, 21.0±5.4  | 0.9 (0.3 to 2.5)   |
| *OR = odds ratio, CI = confidence interval, TLIF = transforaminal lumbar interbody fusion, PLIF = posterior lumbar interbody fusion, PLF = posterolateral fusion, The values are given as the number of patients. †The values are given as the mean ± standard deviation. ‡The values appear in order of percutaneous group and open group. |                                  |                    |                          |                    |                          |                     |                    |
