# Supplementary material for: Minimally Invasive Lumbar Spinal Fusion Is More Effective Than Open Fusion: A Meta-Analysis
Source: PubMed Central journal article supplement — Yonsei Med J. 2018 May 3;59(4):524–38. doi: 10.3349/ymj.2018.59.4.524 (PMC5949295; doi:10.3349/ymj.2018.59.4.524), 2018-05-03
Supplement: ymj-59-524-s008.pdf [file ymj-59-524-s008.pdf]

| Supplementary Table 8. Perioperative surgical data in the prospective comparative studies* |                    |                          |                                |                               |                                 |                                   |                                                        |                           |                      |
|--------------------------------------------------------------------------------------------|--------------------|--------------------------|--------------------------------|-------------------------------|---------------------------------|-----------------------------------|--------------------------------------------------------|---------------------------|----------------------|
| Studies                                                                                    | Comparison group   | Operation time (minutes) | Blood loss                     |                               | Blood transfusion (ml or units) | Radiation exposure time (seconds) | Postoperative intravenous analgesia with morphine (mg) | Time to ambulation (days) | Hospital stay (days) |
|                                                                                            |                    |                          | Intraoperative blood loss (ml) | Postoperative blood loss (ml) |                                 |                                   |                                                        |                           |                      |
| Parker et al. <sup>19</sup>                                                                | Percutaneous group | 274 (227-351)            | 200 (100-400)                  |                               | NR                              | NR                                | NR                                                     | NR                        | 3 (2-4)              |
|                                                                                            | Open group         | 229 (186-274)            | 350 (200-600)                  |                               | NR                              | NR                                | NR                                                     | NR                        | 4 (3-5)              |
| Gu et al. <sup>21</sup>                                                                    | Percutaneous group | 195.5 ± 28.0             | 248.4 ± 94.3                   | NR                            | 0 ± 0 (ml)                      | 45.3 ± 11.7                       | NR                                                     | NR                        | 9.3 ± 3.7            |
|                                                                                            | Open group         | 186.6 ± 23.4             | 576.3 ± 176.2                  | NR                            | 94.7 ± 165.9 (ml)               | 28.9 ± 8.2                        | NR                                                     | NR                        | 12.1 ± 3.6           |
| Lee et al. <sup>22</sup>                                                                   | Percutaneous group | 166.4 ± 52.1             | 50.6 ± 161.0                   | 0 ± 0                         | NR                              | 49.0 ± 33.9                       | 3.4 ± 10.1                                             | 1.2 ± 0.6                 | 3.2 ± 2.9            |
|                                                                                            | Open group         | 181.8 ± 45.4             | 447.4 ± 519.2                  | 528.9 ± 241.6                 | NR                              | 17.6 ± 20.0                       | 33.5 ± 38.6                                            | 3.4 ± 1.1                 | 6.8 ± 3.4            |
| Mobbs et al. <sup>23</sup>                                                                 | Percutaneous group | NR                       | NR                             | NR                            | NR                              | NR                                | 85.90 ± 109.0                                          | 21.9 ± 9.8 (hours)        | 5.9 ± 3.1            |
|                                                                                            | Open group         | NR                       | NR                             | NR                            | NR                              | NR                                | 168.9 ± 170.6                                          | 31.2 ± 15.3 (hours)       | 9.7 ± 6.7            |
| Kotani et al. <sup>24</sup>                                                                | Percutaneous group | 172 ± 33                 | 181 ± NR                       | NR                            | NR                              | NR                                | NR                                                     | NR                        | NR                   |
|                                                                                            | Open group         | 176 ± 37                 | 453 ± NR                       | NR                            | NR                              | NR                                | NR                                                     | NR                        | NR                   |
| Wang et al. <sup>25</sup>                                                                  | Percutaneous group | 139 ± 27                 | 291 ± 86                       | 25 ± 10                       | NR                              | 73 ± 21                           | NR                                                     | NR                        | NR                   |
|                                                                                            | Open group         | 143 ± 35                 | 652 ± 150                      | 147 ± 58                      | NR                              | 39 ± 16                           | NR                                                     | NR                        | NR                   |
| Wang et al. <sup>26</sup>                                                                  | Percutaneous group | 156 ± 32                 | 264 ± 89                       | 39 ± 12                       | 0.1 ± 0.3 (units)               | 84 ± 21                           | NR                                                     | NR                        | 10.6 ± 2.5           |
|                                                                                            | Open group         | 145 ± 27                 | 673 ± 145                      | 158 ± 65                      | 1.5 ± 0.5 (units)               | 37 ± 19                           | NR                                                     | NR                        | 14.6 ± 3.8           |
| Schizas et al. <sup>27</sup>                                                               | Percutaneous group | 5.8 ± NR (hours)         | 456 ± NR                       | 95 ± NR                       | NR                              | 2.7 ± NR (cGy/cm <sup>2</sup> )   | NR                                                     | NR                        | 6.1 ± NR             |
|                                                                                            | Open group         | 5.2 ± NR                 | 961 ± NR                       | 477 ± NR                      | NR                              | 1.8 ± NR (cGy/cm <sup>2</sup> )   | NR                                                     | NR                        | 8.2 ± NR             |
| Park et al. <sup>29</sup>                                                                  | Percutaneous group | 191.7 ± 37.7             | 432.8 ± 294.8                  | 175 ± 162.2                   | 0.2 ± 0.6 (units)               | NR                                | NR                                                     | 1.22 ± 0.6                | 5.3 ± 2.6            |
|                                                                                            | Open group         | 148.8 ± 24.2             | 737.9 ± 224.3                  | 482.9 ± 165.3                 | 1.0 ± 1.1 (units)               | NR                                | NR                                                     | 2.97 ± 1.1                | 10.8 ± 2.5           |

\* NR = not reported.
