# Supplementary material for: Minimally Invasive Lumbar Spinal Fusion Is More Effective Than Open Fusion: A Meta-Analysis
Source: PubMed Central journal article supplement — Yonsei Med J. 2018 May 3;59(4):524–38. doi: 10.3349/ymj.2018.59.4.524 (PMC5949295; doi:10.3349/ymj.2018.59.4.524), 2018-05-03
Supplement: ymj-59-524-s010.pdf [file ymj-59-524-s010.pdf]

| Supplementary Table 10. Subgroup analysis of perioperative surgical data according to the fusion methods* |                                   |                    |                          |                                |                               |                                 |                                   |                                          |                           |                      |
|-----------------------------------------------------------------------------------------------------------|-----------------------------------|--------------------|--------------------------|--------------------------------|-------------------------------|---------------------------------|-----------------------------------|------------------------------------------|---------------------------|----------------------|
| Fusion modalities                                                                                         | Studies                           | Comparison group   | Operation time (minutes) | Blood loss                     |                               | Blood transfusion (ml or units) | Radiation exposure time (seconds) | Postoperative intravenous analgesia (mg) | Time to ambulation (days) | Hospital stay (days) |
|                                                                                                           |                                   |                    |                          | Intraoperative blood loss (ml) | Postoperative blood loss (ml) |                                 |                                   |                                          |                           |                      |
| TLIF                                                                                                      | 6 <sup>19</sup> , 21, 22, 25 - 27 | Percutaneous group | 186.2                    | 210.8                          | 21.3                          | 0.1                             | 62.8                              | 3.4                                      | 1.2                       | 6.5                  |
|                                                                                                           |                                   | Open group         | 177.1                    | 539.7                          | 278.0                         | 1.5                             | 30.6                              | 33.5                                     | 3.4                       | 9.4                  |
|                                                                                                           |                                   | WMD                | 20.3†                    | 268.4†                         | 120.3†                        | 1.4†                            | 25.4†                             | 30.1†                                    | 2.2†                      | 1.2†                 |
| PLIF                                                                                                      | 2 <sup>23</sup> , 29              | Percutaneous group | 191.7                    | 432.8                          | 175.0                         | 0.2                             |                                   | 85.9                                     | 11.5                      | 5.6                  |
|                                                                                                           |                                   | Open group         | 148.8                    | 737.9                          | 482.9                         | 1.0                             |                                   | 168.9                                    | 17.1                      | 10.2                 |
|                                                                                                           |                                   | WMD                | 42.9†                    | 305.1†                         | 307.9†                        | 0.8†                            |                                   | 83.0†                                    | 1.8†                      | 5.1†                 |
| PLF                                                                                                       | 1 <sup>24</sup>                   | Percutaneous group | 172                      | NR                             | NR                            | NR                              | NR                                | NR                                       | NR                        | NR                   |
|                                                                                                           |                                   | Open group         | 176                      |                                |                               |                                 |                                   |                                          |                           |                      |

\*TLIF = transforaminal lumbar interbody fusion, PLIF = posterior lumbar interbody fusion, PLF = posterolateral fusion, and WMD = weighted mean difference. †p < 0.0001.
